# Supplementary material for: Deep, multi-stage transcriptome of the schistosomiasis vector Biomphalaria glabrata provides platform for understanding molluscan disease-related pathways
Source: Springer Nature journal article supplement (doi:10.1186/s12879-016-1944-x), 2016-10-28

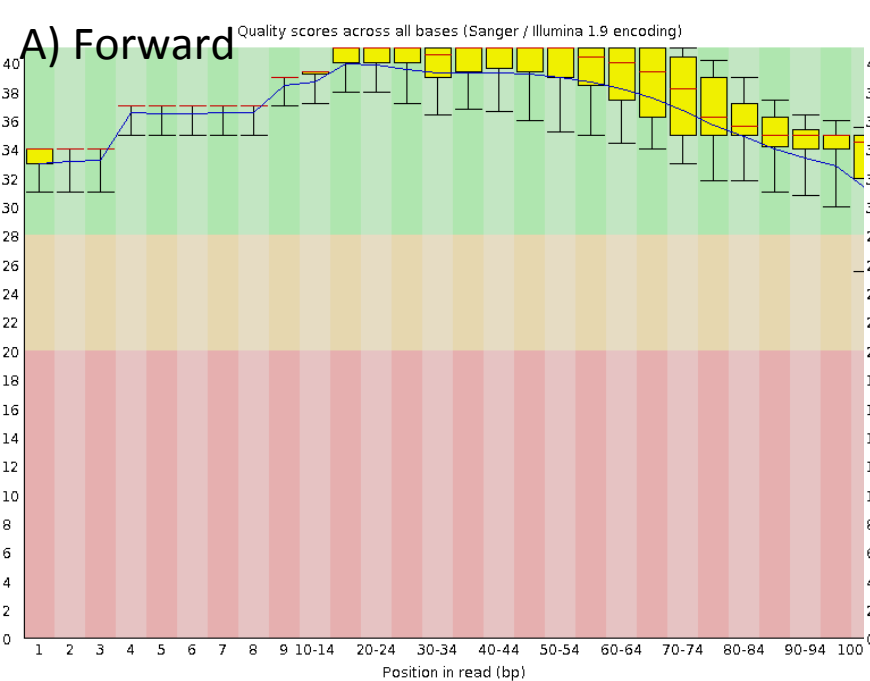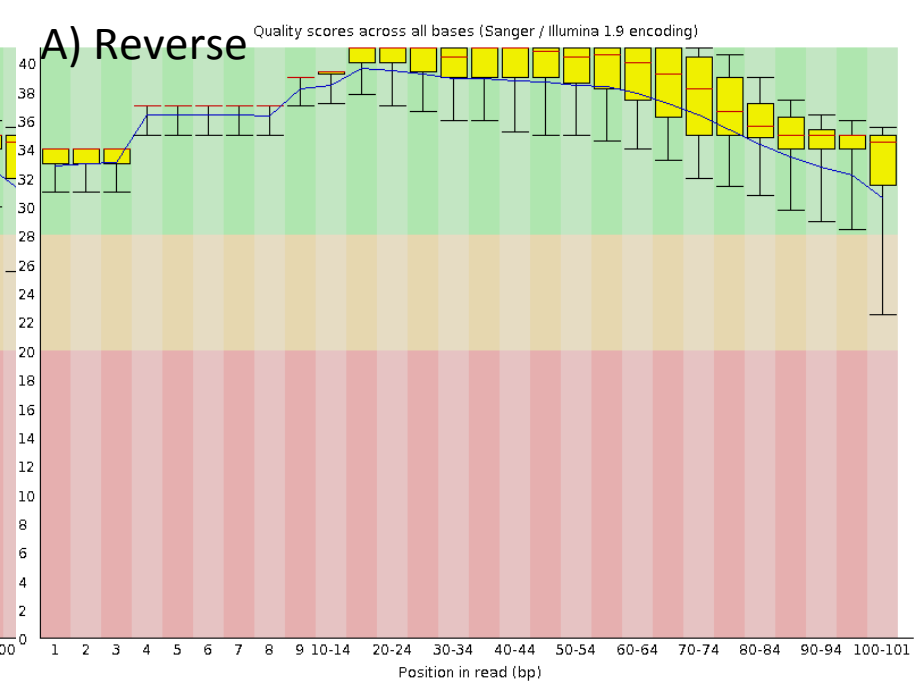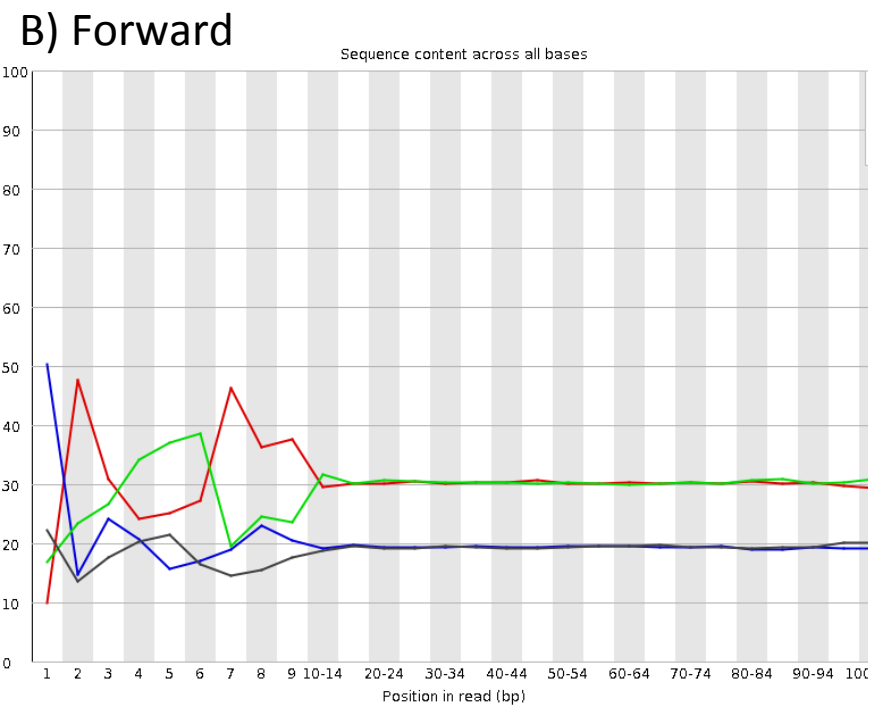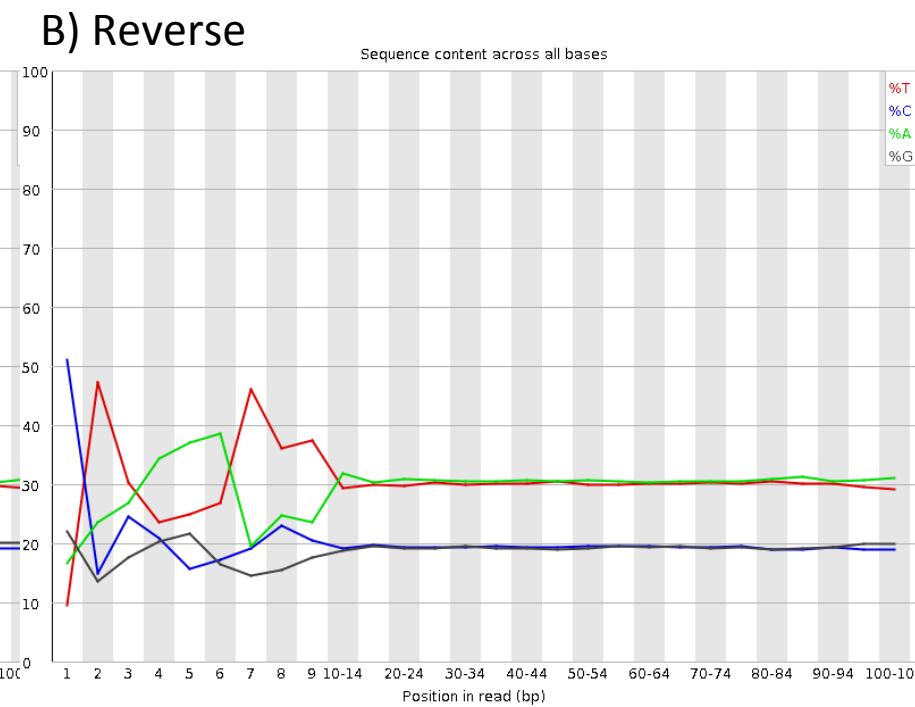

Supplement: MOESM1 [file 10996428]
